# Supplementary material for: Genetic diversity and natural selection footprints of the glycine amidinotransferase gene in various human populations
Source: PubMed Central journal article supplement (PMC4700420; doi:10.1038/srep18755), 2016-01-05

# Genetic diversity and natural selection footprints of the glycine amidinotransferase gene in various human populations

**Running Title: Diversity and Natural selection on *GATM***

**Keywords:** *GATM*, *AGAT*, *Genetic diversity*, *Natural selection*

**Asifullah Khan<sup>1,2,§</sup>, Lei Tian<sup>1,§</sup>, Chao Zhang<sup>1</sup>, Kai Yuan<sup>1</sup>, Shuhua Xu<sup>1,3,4,\*</sup>**

<sup>1</sup>Chinese Academy of Sciences (CAS) Key Laboratory of Computational Biology, Max Planck Independent Research Group on Population Genomics, CAS-MPG Partner Institute for Computational Biology (PICB), Shanghai Institutes for Biological Sciences, Chinese academy of Sciences, Shanghai 200031, China;

<sup>2</sup>Department of Biochemistry, Abdul Wali Khan University Mardan (AWKUM), Mardan, Khyber Pakhthunkhwa, Pakistan;

<sup>3</sup>School of Life Science and Technology, ShanghaiTech University, Shanghai 200031, China;

<sup>4</sup>Collaborative Innovation Center of Genetics and Development, Shanghai 200438, China.

<sup>§</sup>These two authors have contributed equally to this work.

\*Correspondence and requests for materials should be addressed to S.X. ([xushua@picb.ac.cn](mailto:xushua@picb.ac.cn)).

### Supplementary figures legends:

**Figure S1:** Estimation of pairwise  $F_{ST}$  values for the *GATM* gene among different human populations.

**Figure S2:** Distribution of  $F_{ST}$  differentiation ratios for the *GATM* gene and 68 statin response-associated genes. Black dots represent genes that contain no SNPs.

**Figure S3:** (A) Allele frequency plot of *GATM* eQTL experimentally proved to be associated with statin associated myopathy. (B) Population wide global  $F_{st}$  calculation for three eQTLs experimentally proved in association with statin response. Two of these eQTLs (i.e. rs1719247 and rs1346268) are showing allele frequency difference  $> 1\%$  whole genome  $F_{st}$  differentiation.

**Figure S4:** Estimation of  $\ln R_{sb}$ ,  $\Delta DAF$ , and  $F_{ST}$  around the *GATM* gene. The red and green lines indicate the respective top 1% and top 5% thresholds of these abovementioned parameters at the whole-genome level.

**Figure S5:** Recombination hotspots observed within the vicinity of the *GATM* gene in the CEU population. The *GATM* gene is indicated in red. Data on the CHB and YRI populations are also shown for comparison.

**Figure S6:** Linkage disequilibrium (LD) plot across the *GATM* gene in the CEU, CHB, and YRI populations.

Figure S1

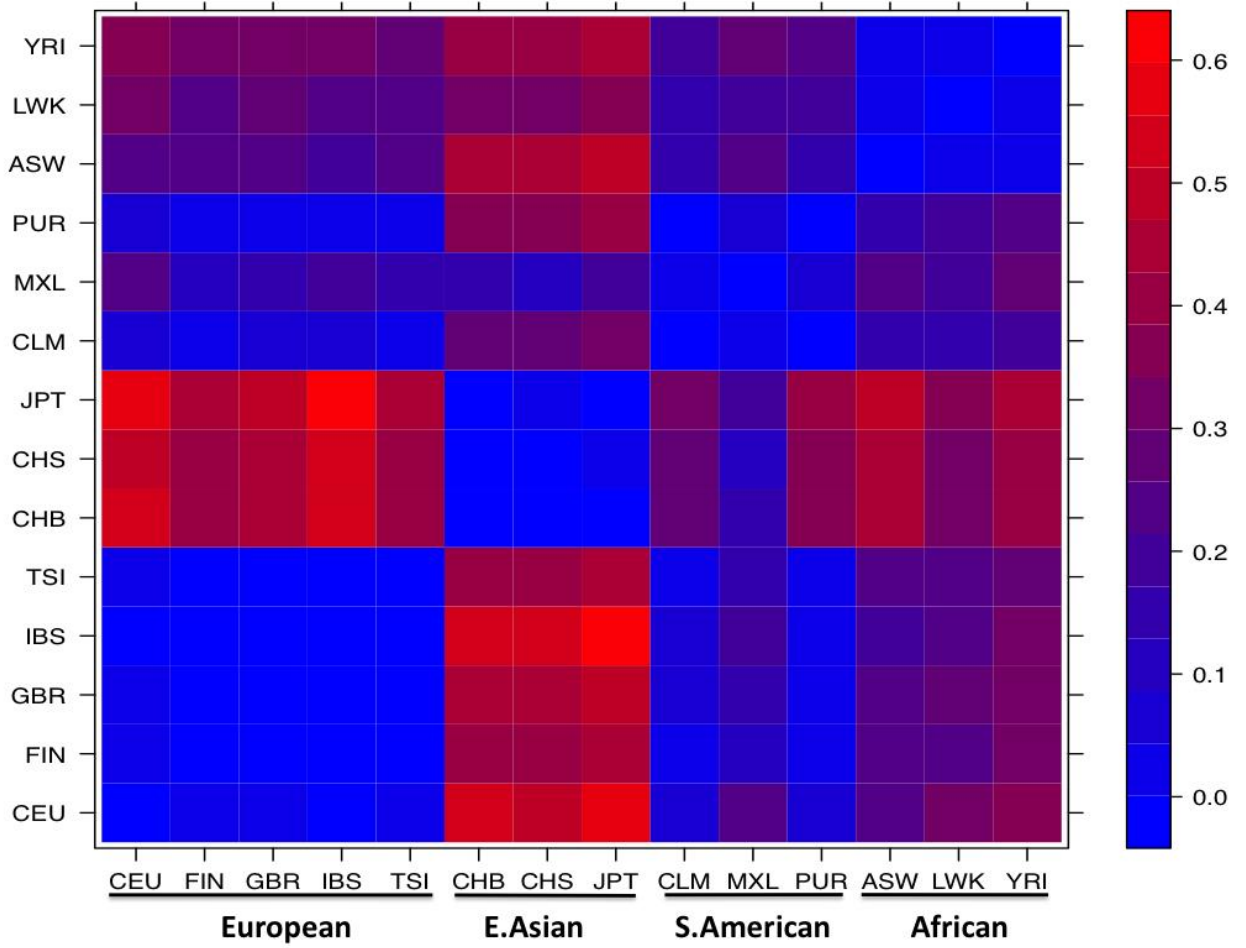

Figure S2

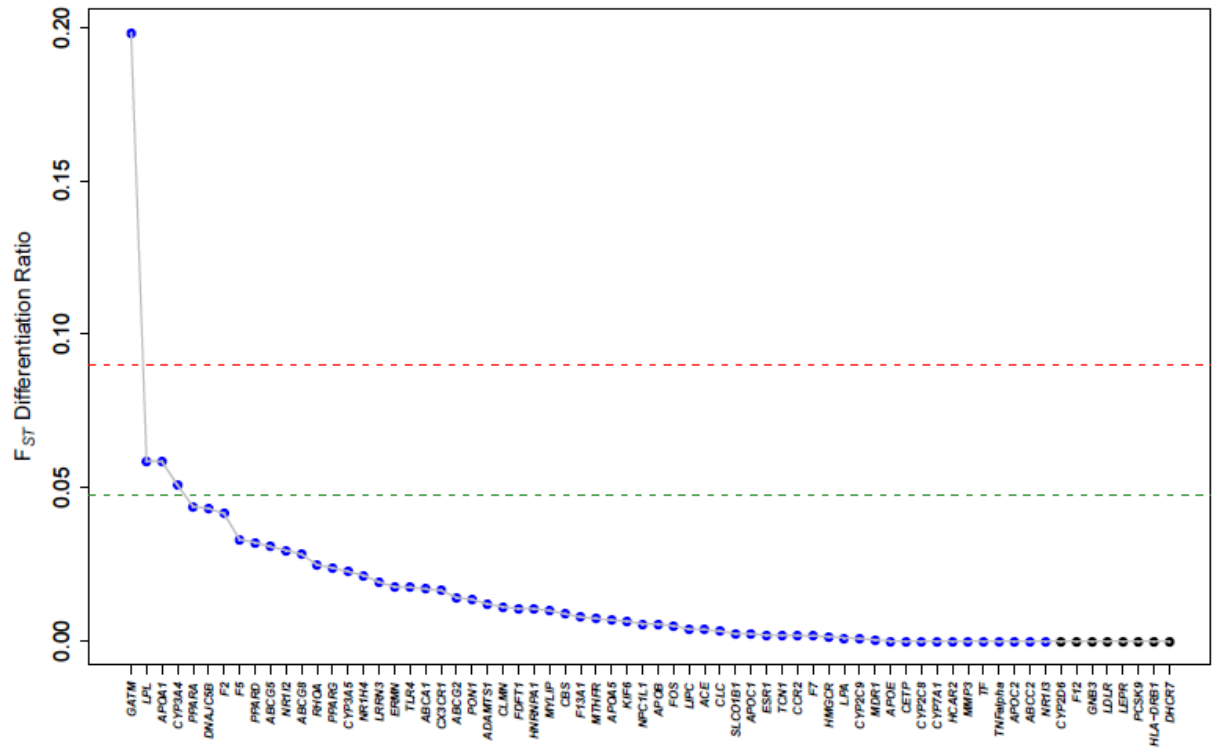

**Figure S3**

**A.**

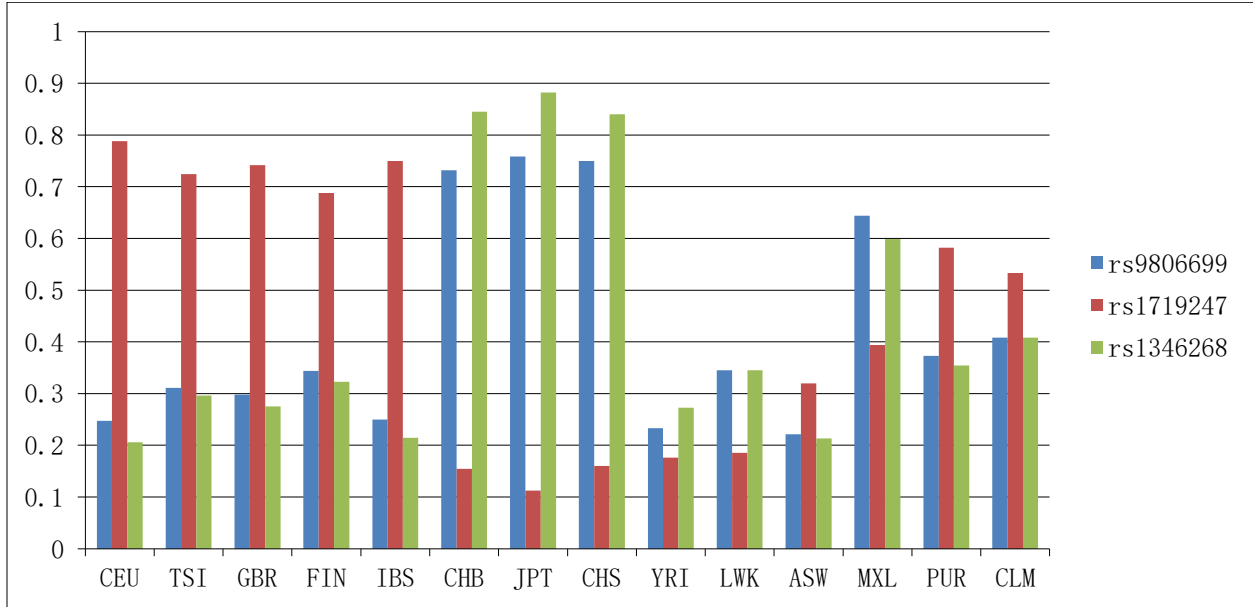

**B.**

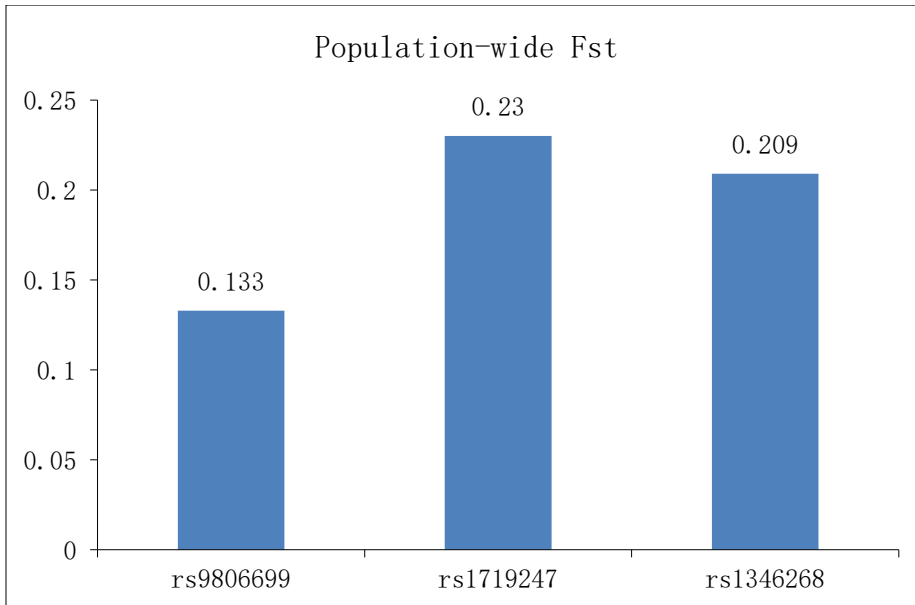

Figure S4

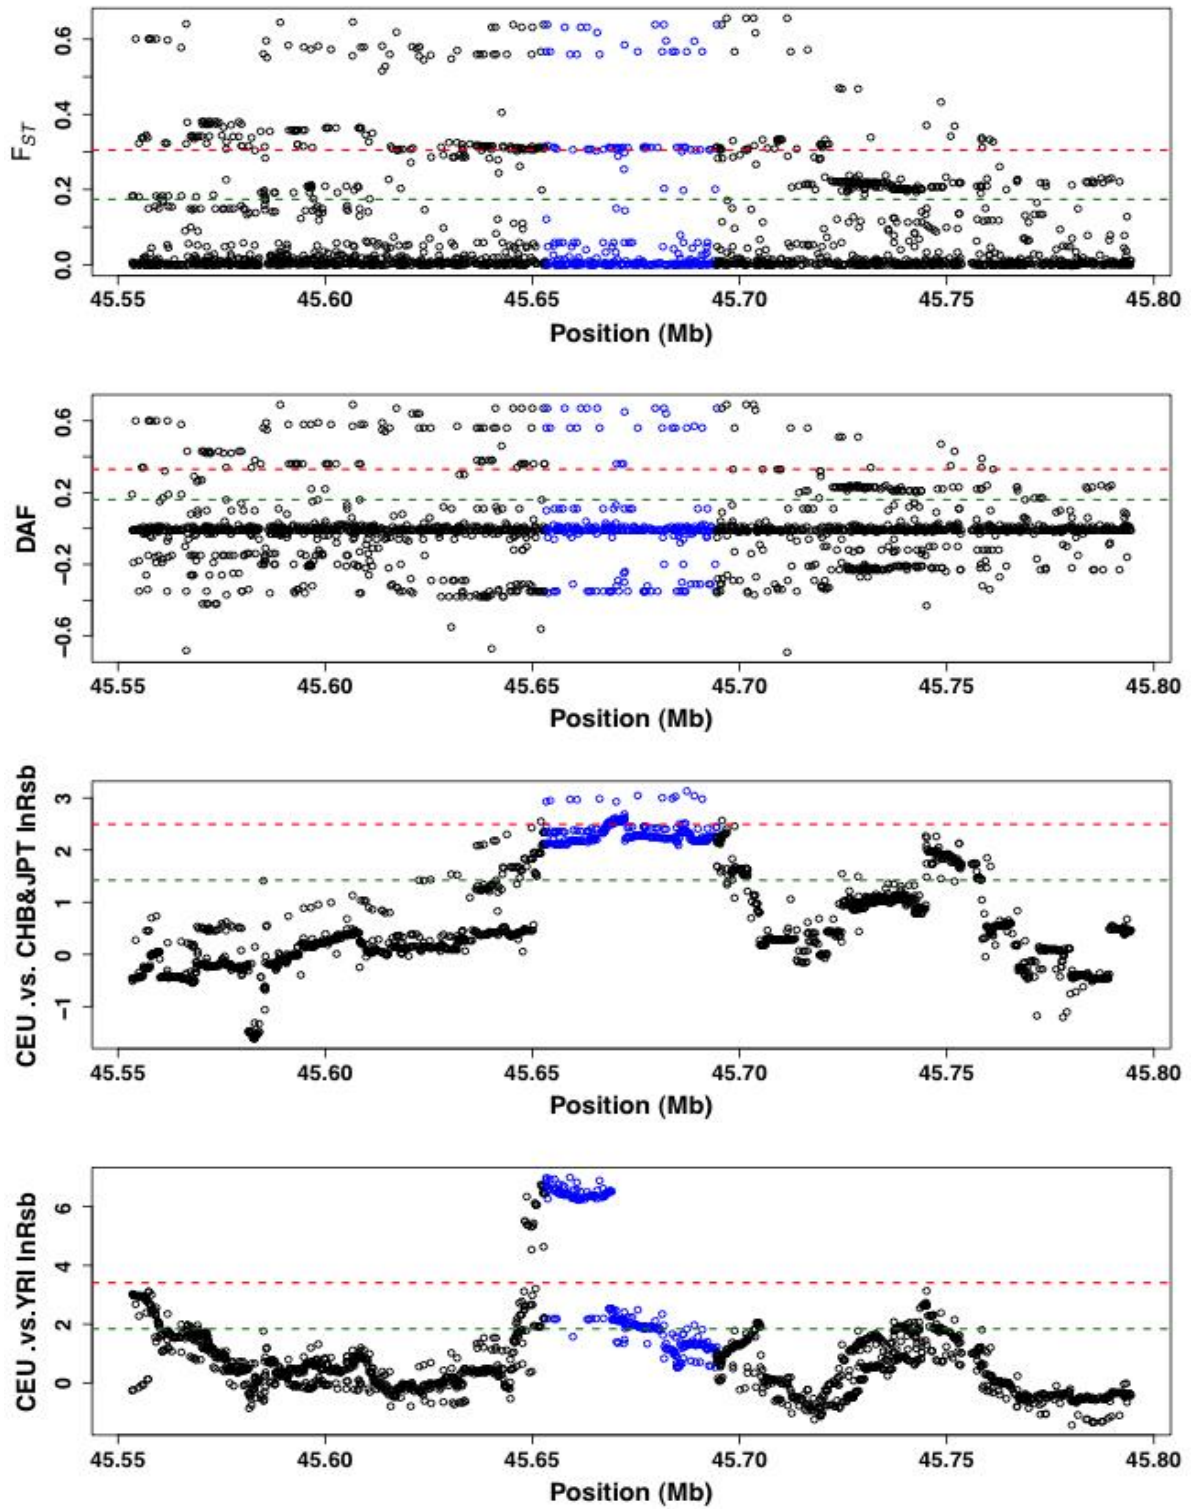

**Figure S5**

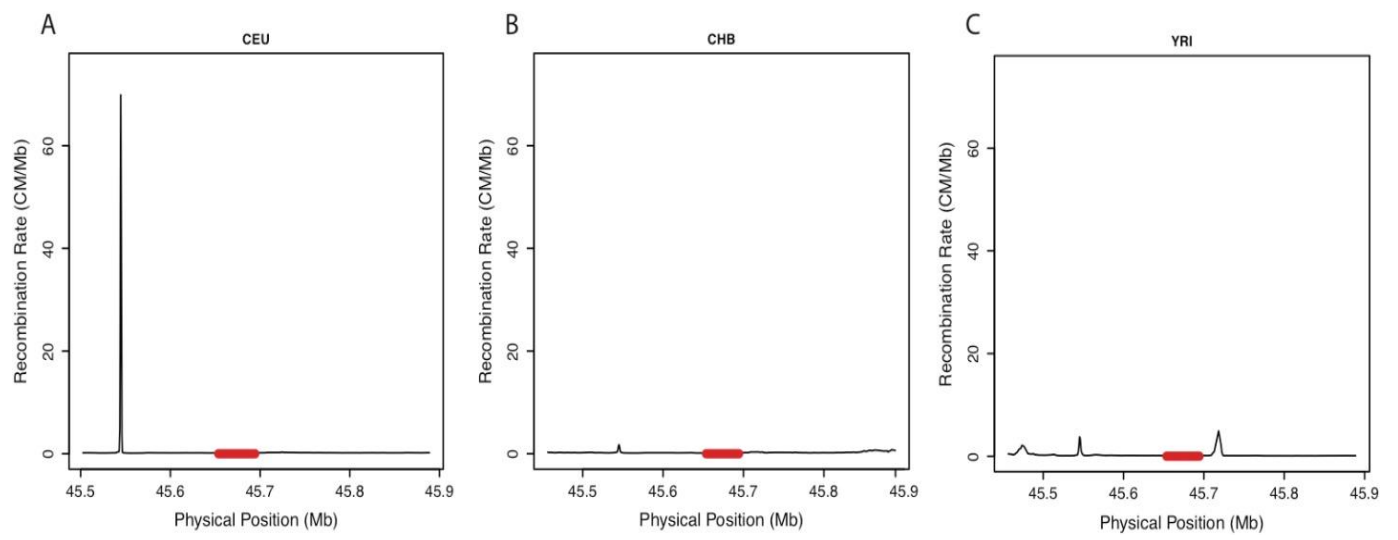

Figure S6

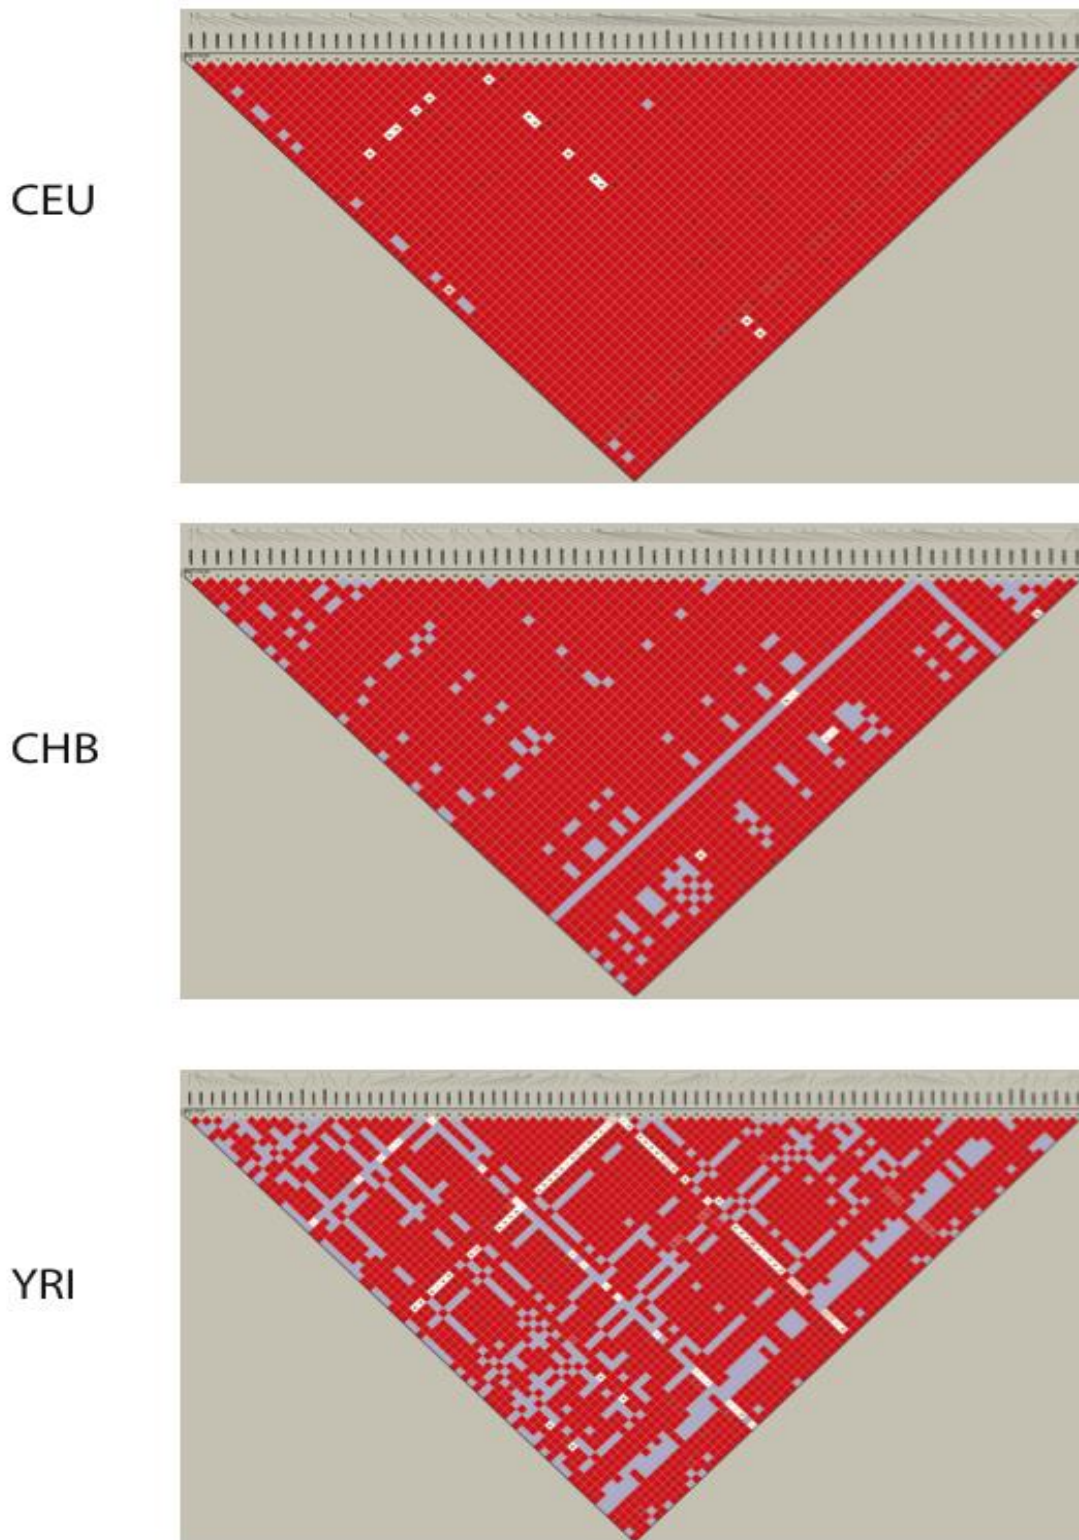

Supplement: srep18755-s1.pdf [file srep18755-s1.pdf]
